# Supplementary material for: Analysis of Non-Volatile Compounds in Jasmine Tea and Jasmine Based on Metabolomics and Sensory Evaluation
Source: MDPI journal article supplement (doi:10.3390/foods12193708), 2023-10-09

**Table S1:**  
Information of the key characteristic compounds in jasmmine tea

| Tentative Identification                                                                                  | No.  | m/z     | RT(min) | Formula     | CAS         | VIP     | Flavor descriptor |
|-----------------------------------------------------------------------------------------------------------|------|---------|---------|-------------|-------------|---------|-------------------|
| Heterocyclic Compounds                                                                                    |      |         |         |             |             |         |                   |
| Catechin                                                                                                  | X159 | 289.072 | 7.79    | C15H14O6    | 154-23-4    | 6.10885 | Slightly bitter   |
| Cyanuric acid                                                                                             | X273 | 128.01  | 11.45   | C3H3N3O3    | 108-80-5    | 3.84875 |                   |
| indoline                                                                                                  | X282 | 120.081 | 6.07    | C8H9N       | 496-15-1    | 2.5517  |                   |
| Gliquidone                                                                                                | X263 | 526.203 | 9.02    | C27H33N3O6S | 33342-05-1  | 2.18812 |                   |
| (1H-Indol-3-yl)(2,2,3,3-tetramethylcyclopropyl)methanone                                                  | X292 | 242.158 | 2.58    | C16H19NO    | 895152-66-6 | 1.42313 |                   |
| Amino Acidsand their derivatives                                                                          |      |         |         |             |             |         |                   |
| L-Isoleucine                                                                                              | X271 | 132.066 | 2.98    | C6H13NO2    | 443-79-8    | 4.20053 | Bitter            |
| L-Valine                                                                                                  | X45  | 118.086 | 2.30    | C5H11NO2    | 72-18-4     | 7.06329 | Bitter            |
| L-Lysine                                                                                                  | X47  | 129.102 | 1.77    | C6H14N2O2   | 56-87-1     | 3.9618  |                   |
| Dimethylglycine                                                                                           | X125 | 104.071 | 2.24    | C4H9NO2     | 1118-68-9   | 2.24031 |                   |
| L-Arginine                                                                                                | X213 | 175.119 | 1.44    | C6H14N4O2   | 74-79-3     | 1.99798 |                   |
| 2-Aminoisobutyric acid                                                                                    | X44  | 104.071 | 5.39    | C4H9NO2     | 62-57-7     | 1.91651 |                   |
| 2-(Methylamino)benzoic acid                                                                               | X296 | 152.07  | 11.95   | C8H9NO2     | 119-68-6    | 1.75881 |                   |
| N-Alpha-acetyllysine                                                                                      | X224 | 188.07  | 6.72    | C8H16N2O3   | 1946-82-3   | 1.67215 |                   |
| L-Glutamine                                                                                               | X115 | 146.081 | 1.60    | C5H10N2O3   | 56-85-9     | 1.64328 |                   |
| Guanidoacetic acid                                                                                        | X193 | 117.055 | 2.26    | C3H7N3O2    | 352-97-6    | 1.27986 |                   |
| Organic acid                                                                                              |      |         |         |             |             |         |                   |
| Jasmonic Acid                                                                                             | X21  | 211.132 | 0.54    | C12H18O3    | 6894-38-8   | 1.47566 |                   |
| Pipecolic acid                                                                                            | X46  | 130.05  | 2.43    | C6H11NO2    | 535-75-1    | 5.14305 |                   |
| Isochlorogenic acid b                                                                                     | X57  | 515.119 | 9.22    | C25H24O12   | 14534-61-3  | 3.67118 |                   |
| 3-(3,4-Dihydroxy-5-methoxy)-2-propenoic acid                                                              | X101 | 211.06  | 5.17    | C10H10O5    | 110642-42-7 | 2.98238 |                   |
| 3,4-Dihydroxybenzeneacetic acid                                                                           | X206 | 168.042 | 1.39    | C8H8O4      | 102-32-9    | 2.38647 | Pungent           |
| O-Methyl anthranilate                                                                                     | X122 | 152.07  | 13.59   | C8H9NO2     | 134-20-3    | 1.57832 |                   |
| Succinic acid semialdehyde                                                                                | X107 | 101.023 | 1.87    | C4H6O3      | 692-29-5    | 1.13965 |                   |
| trans-Cinnamate                                                                                           | X167 | 131.049 | 8.82    | C9H8O2      | 140-10-3    | 1.07538 |                   |
| Terpenoid                                                                                                 |      |         |         |             |             |         |                   |
| Gamma-terpinene                                                                                           | X24  | 137.132 | 13.60   | C10H16      | 99-85-4     | 4.77532 |                   |
| Pulegone                                                                                                  | X23  | 153.127 | 7.78    | C10H16O     | 89-82-7     | 2.62635 |                   |
| (2E)-2-(hydroxymethyl)-3-[3-oxo-5-(propan-2-yl)-1,3,4,5,6,7-hexahydro-2-benzofuran-4-yl]prop-2-enoic acid | X312 | 279.124 | 9.46    | C15H20O5    |             | 2.36761 |                   |
| Betulin                                                                                                   | X32  | 443.387 | 13.38   | C30H50O2    | 473-98-3    | 2.32406 |                   |
| 1,4-Dimethyl-7-ethylazulene                                                                               | X191 | 167.118 | 0.57    | C14H16      | 529-05-5    | 1.58385 |                   |
| Alkaloids                                                                                                 |      |         |         |             |             |         |                   |
| 7-Methylxanthine                                                                                          | X235 | 147.03  | 5.60    | C6H6N4O2    | 552-62-5    | 1.41064 | Bitter            |
| Theobromine                                                                                               | X200 | 181.071 | 13.34   | C7H8N4O2    | 83-67-0     | 8.08453 |                   |
| 1-Methylxanthine                                                                                          | X220 | 167.056 | 5.20    | C6H6N4O2    | 6136-37-4   | 1.31789 |                   |
| Sanguinarine                                                                                              | X54  | 333.095 | 6.75    | C20H14NO4   | 2447-54-3   | 1.14211 |                   |

|                                                                                                                                       |      |         |       |               |             |         |               |
|---------------------------------------------------------------------------------------------------------------------------------------|------|---------|-------|---------------|-------------|---------|---------------|
| Lipids                                                                                                                                |      |         |       |               |             |         |               |
| Suberic acid                                                                                                                          | X215 | 173.081 | 6.73  | C8H14O4       | 505-48-6    | 1.09389 | Woody, bitter |
| Jasmone                                                                                                                               | X29  | 165.127 | 13.44 | C11H16O       | 488-10-8    | 1.02885 |               |
| (Z)-4-Hydroxy-6-dodecenoic acid lactone                                                                                               | X60  | 177.038 | 12.71 | C6H10O6       | 18679-18-0  | 1.33117 |               |
| Galactosylsphingosine                                                                                                                 | X188 | 461.341 | 12.98 | C24H47NO7     | 2238-90-6   | 1.31691 |               |
| Stearidonic acid                                                                                                                      | X91  | 259.206 | 13.81 | C18H28O2      | 20290-75-9  | 1.36217 |               |
| Acetoacetic acid                                                                                                                      | X124 | 103.039 | 0.54  | C4H6O3        | 541-50-4    | 1.33988 |               |
| Flavonoids and their glycosides                                                                                                       |      |         |       |               |             |         |               |
| Kaempferol 3-sophorotrioside                                                                                                          | X227 | 773.222 | 8.15  | C33H40O21     | 80714-53-0  | 4.865   |               |
| Afzelechin                                                                                                                            | X214 | 275.091 | 8.49  | C15H14O5      | 2545-00-8   | 3.51076 |               |
| Isoscutellarein                                                                                                                       | X272 | 287.054 | 9.94  | C15H10O6      | 41440-05-5  | 2.08123 |               |
| Kaempferitrin                                                                                                                         | X209 | 577.157 | 7.08  | C27H30O14     | 482-38-2    | 1.23048 |               |
| Luteolin                                                                                                                              | X162 | 286.043 | 11.84 | C15H10O6      | 491-70-3    | 1.12786 |               |
| Aromadendrin                                                                                                                          | X133 | 288.058 | 8.51  | C15H12O6      | 480-20-6    | 1.10258 |               |
| Eriodictyol                                                                                                                           | X123 | 287.056 | 10.81 | C15H12O6      | 552-58-9    | 1.03301 |               |
| Carbohydrates and carbohydrate derivatives                                                                                            |      |         |       |               |             |         |               |
| Thermopsoside, crotonoyl                                                                                                              | X2   | 530.141 | 11.93 | C26H26O12     |             | 1.23049 | Sweet         |
| L-Arabinose                                                                                                                           | X19  | 131.035 | 13.85 | C5H10O5       | 87-72-9     | 1.14298 |               |
| Mannitol                                                                                                                              | X205 | 182.081 | 5.76  | C6H14O6       | 69-65-8     | 1.55395 |               |
| Galactose 1-phosphate                                                                                                                 | X291 | 241.011 | 1.55  | C6H13O9P      | 2255-14-3   | 1.33497 |               |
| 2',3,4,4',6'-Peptahydroxychalcone 4'-O-glucoside                                                                                      | X42  | 451.137 | 12.17 | C21H22O11     |             | 1.1591  |               |
| Phenols                                                                                                                               |      |         |       |               |             |         |               |
| Gentisate aldehyde                                                                                                                    | X148 | 137.024 | 13.87 | C7H6O3        | 1194-98-5   | 1.37906 |               |
| Schizandrin                                                                                                                           | X183 | 431.215 | 13.85 | C24H32O7      | 7432-28-2   | 1.32567 |               |
| Rosmarinic acid                                                                                                                       | X180 | 359.134 | 8.58  | C18H16O8      | 20283-92-5  | 1.20762 |               |
| Piceatannol                                                                                                                           | X77  | 225.058 | 11.90 | C14H12O4      | 10083-24-6  | 2.9171  |               |
| Others                                                                                                                                |      |         |       |               |             |         |               |
| 4-Hydroxybenzoate                                                                                                                     | X143 | 137.022 | 8.71  | C7H6O3        | 456-23-5    | 1.22008 |               |
| trans-3,4-Difluorocinnamic acid                                                                                                       | X99  | 184.033 | 7.49  | C9H6F2O2      | 112897-97-9 | 3.18789 |               |
| 4-Hydroxy-3-(3-methyl-2-butenyl)acetophenone                                                                                          | X149 | 187.108 | 1.69  | C13H16O2      | 26932-05-8  | 1.33391 |               |
| Hispidulin acetate                                                                                                                    | X286 | 425.088 | 9.48  | C22H18O9      | 1178-23-0   | 6.2161  |               |
| 1-(+)-Rhamnose monohydrate                                                                                                            | X283 | 181.068 | 11.83 | C6H14O6       | 10030-85-0  | 5.55958 |               |
| Neoglucobrassicin                                                                                                                     | X145 | 478.072 | 8.82  | C17H22N2O10S2 | 5187-84-8   | 3.06432 |               |
| Kojic acid                                                                                                                            | X25  | 143.034 | 2.23  | C6H6O4        | 501-30-4    | 2.1191  |               |
| 3-Methyl-1-(2,4,6-trihydroxyphenyl)-1-butanone                                                                                        | X222 | 211.097 | 8.23  | C11H14O4      | 26103-97-9  | 2.01478 |               |
| N-Carbamoylputrescine                                                                                                                 | X105 | 132.102 | 9.01  | C5H13N3O      | 6851-51-0   | 1.924   |               |
| Violanthin                                                                                                                            | X208 | 578.164 | 7.44  | C27H30O14     | 40581-17-7  | 1.84346 |               |
| 4-Hydroxy-3-(3-methyl-2-buten-1-yl)phenyl 6-O-[(2R,3R,4R)-3,4-dihydroxy-4-(hydroxymethyl)tetrahydro-2-furanyl]-beta-D-glucopyranoside | X302 | 471.187 | 8.96  | C22H32O11     |             | 1.64882 |               |

|                                    |      |         |       |              |             |         |       |
|------------------------------------|------|---------|-------|--------------|-------------|---------|-------|
| Narirutin                          | X195 | 579.175 | 1.63  | C27H32O14    | 14259-46-2  | 1.52063 | Sweet |
| Choline                            | X64  | 104.107 | 7.31  | C5H14NO      | 62-49-7     | 1.40537 |       |
| Citric acid                        | X68  | 190.927 | 3.10  | C6H8O7       | 77-92-9     | 1.31941 |       |
| Cyanidin 3-(2G-glucosylrutinoside) | X192 | 757.222 | 8.38  | C33H41O20    | 55028-57-4  | 1.28468 |       |
| Hydroxyphenyllactic acid           | X88  | 183.077 | 0.54  | C9H10O4      | 306-23-0    | 1.31752 |       |
| Epoxy Fluor 7                      | X1   | 390.138 | 5.01  | C23H19NO5    | 863223-43-2 | 1.1538  |       |
| Uridine 5'-triphosphate tris salt  | X4   | 467.134 | 11.17 | C9H15N2O15P3 | 108321-53-5 | 1.04578 |       |
| Mudanpioside A                     | X76  | 613.192 | 7.19  | C31H34O13    |             | 1.03987 |       |
| Tyrosol                            | X196 | 138.066 | 6.03  | C8H10O2      | 501-94-0    | 1.08951 |       |

**Table S2:**

Aroma scores of samples.

| Samples | Floral | Grassy | Pungent |
|---------|--------|--------|---------|
| T1      | 0      | 0      | 0       |
| T2      | 2      | 1      | 1       |
| T3      | 3      | 3      | 4.5     |
| F1      | 4      | 5      | 1       |
| F2      | 4.5    | 4      | 3.5     |
| F3      | 5      | 2      | 5       |

**Figure S1.** Multivariate analysis of tea (*Camellia sinensis*) products processed with no scenting (T1) and scenting (T2 and T3). (A) Principal component analysis (PCA) score plot; (B) Dendrogram plot obtained through PCA; (C) Permutation plot of orthogonal partial least-squares discriminant analysis (OPLS-DA) with T2 versus T1 (intercepts of  $R^2$  and  $Q^2$  being 0.432 and  $-1.08$ , respectively); and (D) permutation plot of OPLS-DA with T3 versus T1 (intercepts of  $R^2$  and  $Q^2$  being 0.335 and  $-1.07$ , respectively).

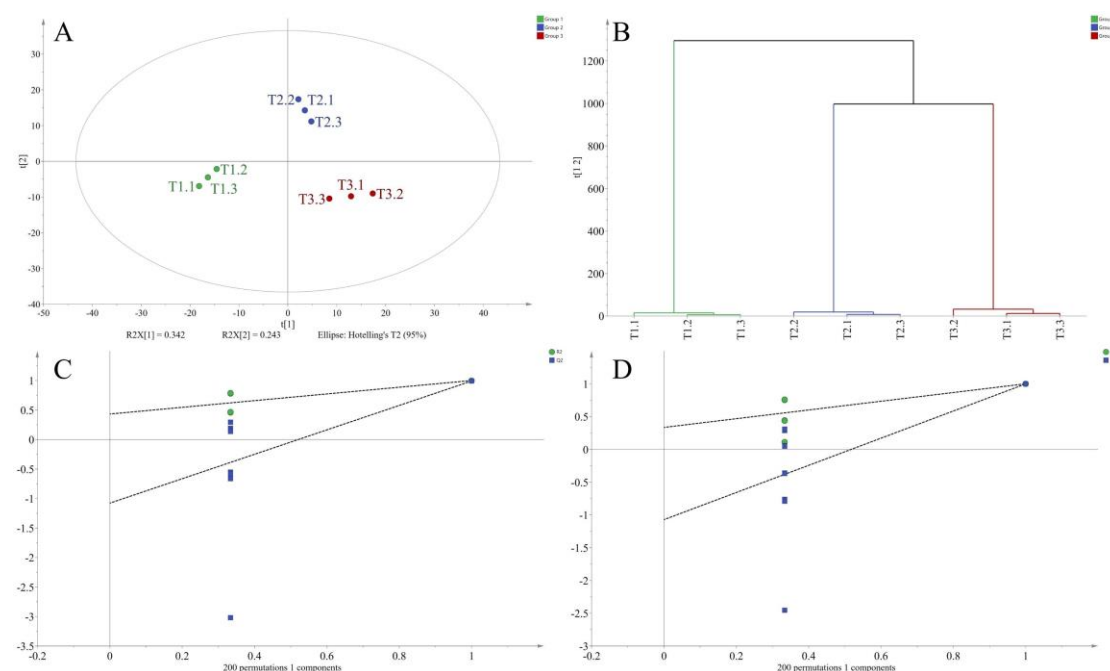

Supplement: s1 [file s1]
